# Supplementary material for: A mutation in the atrial-specific myosin light chain gene (MYL4) causes familial atrial fibrillation
Source: PubMed Central journal article supplement (PMC4832069; doi:10.1038/ncomms11303), 2016-04-12
Supplement: ncomms11303-s1.pdf [file ncomms11303-s1.pdf]

## Supplemental Information

### Supplementary Figure 1

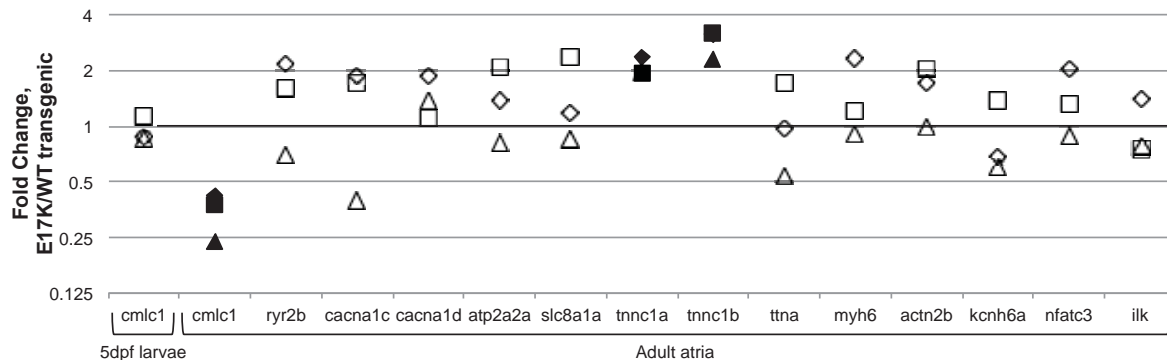

#### Relative expression of select genes in E17K transgenic compared to WT transgenic.

*cmlc1* was assayed at 5dpf, when larvae exhibit myofibrillar disarray but no changes in chamber size or function, and also at adult stage from dissected atria. Other select genes were also assayed in adult atrium. Biological replicates are plotted for each gene; different replicates are designated by square, diamond, and triangle symbols. Black symbols represent statistically significant fold changes in the E17K transgenic compared to the WT transgenic (using a two-tailed t-test,  $p$  values for adult *cmlc1*, *tnnc1a*, and *tnnc1b* are  $p=0.003$ ,  $p=0.003$ ,  $p=0.001$ , respectively). *cmlc1*, cardiac myosin light chain 1; *ryr2b*, ryanodine receptor 2b; *cacna1c*, L-type voltage-dependent calcium channel alpha subunit 1c; *cacna1d*, L-type voltage-dependent calcium channel alpha subunit 1d; *atp2a2a*, calcium-transporting cardiac ATPase; *slc8a1a*, sodium-calcium exchanger member 1a; *tnnc1a*, troponin C type 1a; *tnnc1b*, troponin C type 1b; *ttna*, titin a; *myh6*, cardiac myosin heavy chain 6 alpha; *actn2b*, alpha actinin; *kcnh6a*, potassium voltage-gated channel 6a; *nfatc3c*, calcineurin-dependent nuclear factor of activated T cells 3a; *ilk*, integrin-linked kinase.

## Supplementary Figure 2

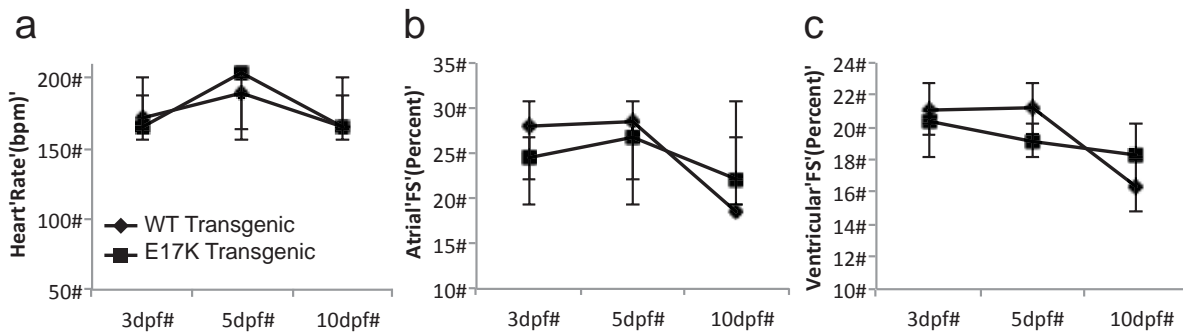

**Function of larval E17K transgenics is preserved.** (a-c) Heart rate, atrial fractional shortening, and ventricular fractional shortening of mutant transgenic zebrafish larvae were similar to WT transgenic larvae at 3, 5, and 10 dpf.

**Supplementary Table 1. Novel protein-altering variants shared by affected individuals.**

| Gene           | Identified AA change | Chr | Position (hg19) | Base change | Conservation score* | Polyphen-2 score          | Mutation Taster <sup>†</sup> |
|----------------|----------------------|-----|-----------------|-------------|---------------------|---------------------------|------------------------------|
| <i>MYL4</i>    | E11K                 | 17  | 45286819        | G>A         | High (0.999)        | Possibly Damaging (0.608) | Disease causing (0.997)      |
| <i>IL13RA2</i> | F357L                | X   | 114239807       | A>G         | Low (0.0)           | Benign (0)                | Polymorphism (1)             |
| <i>SCN7A</i>   | S812G                | 2   | 167288986       | T>C         | Moderate (0.315)    | Possibly Damaging (0.904) | Polymorphism (1)             |
| <i>FNBP1</i>   | T576I                | 9   | 132658236       | G>A         | Moderate (0.343)    | Benign (0)                | Polymorphism (0.743)         |
| <i>A2ML1</i>   | V1394A               | 12  | 9021759         | T>C         | High (1.0)          | Possibly Damaging (0.604) | Polymorphism (0.996)         |
| <i>KRT39</i>   | S335F                | 17  | 39116746        | G>A         | High (1.0)          | Probably Damaging (1)     | Disease Causing (1)          |

\*Maximum score = 1 (based on phastCons analysis)

<sup>†</sup>Value given is the probability of the prediction's accuracy

**Supplementary Table 2. Gene Ontology of novel protein altering variants.**

| Gene           | Protein                                | Highest Tissue Expression | Cellular Component                | Molecular Function               | Biological Process                                  |
|----------------|----------------------------------------|---------------------------|-----------------------------------|----------------------------------|-----------------------------------------------------|
| <i>MYL4</i>    | essential atrial myosin light chain 1  | atrial myocardium         | intracellular, actin cytoskeleton | structural activity              | muscle contraction                                  |
| <i>IL13RA2</i> | Interleukin 13 receptor, alpha 2       | testis                    | cell membrane                     | cytokine receptor activity       | immune system response                              |
| <i>SCN7A</i>   | Type VIIA voltage-gated sodium channel | brain                     | cell membrane                     | cation transmembrane transporter | Central Nervous System, sodium concentration sensor |
| <i>FNBP1</i>   | formin binding protein 1               | thymus, white blood cells | intracellular, lysosomes          | lipid binding                    | clathrin-mediated endocytosis                       |
| <i>A2ML1</i>   | alpha-2-macroglobulin-like-1           | epithelium, esophagus     | extracellular space               | peptidase inhibitor activity     | regulation of endopeptidase activity                |
| <i>KRT39</i>   | type 1 hair keratin (keratin-39)       | epithelium                | intermediate filaments            | structural activity              | cellular structure                                  |
